# Supplementary material for: Long-term recovery of the fecal microbiome and metabolome of dogs with steroid-responsive enteropathy
Source: Preprints.org preprint supplement (doi:10.20944/preprints202106.0493.v1), 2021-06-21
Supplement: Supplementary file 1 [file supplementary]

**Supplementary figure 2:** Abundance of fecal metabolites (n=30) found to be significantly affected by SRE, organized in alphabetic order. Red asterisks indicate statistical significance compared to healthy controls.
