# Supplementary material for: Long-term recovery of the fecal microbiome and metabolome of dogs with steroid-responsive enteropathy
Source: Preprints.org preprint supplement (doi:10.20944/preprints202106.0493.v1), 2021-06-21
Supplement: Supplementary file 2 [file Supplementary_figure_1_alpha_div.docx]

**Supplementary figure 1:** Alpha diversity parameters Chao1, Observed ASVs, and Shannon Index in healthy controls (HC) and dogs with SRE over time. No statistical significance was found.
