# Supplementary material for: Long-term recovery of the fecal microbiome and metabolome of dogs with steroid-responsive enteropathy
Source: Preprints.org preprint supplement (doi:10.20944/preprints202106.0493.v1), 2021-06-21
Supplement: Supplementary file 4 [file Supplementary_table_1.xlsx]

## Sheet: SRE vs HC
PHYLUM
Bacterial group		HC			SRE Baseline			SRE 3 Weeks			SRE 8 Weeks			SRE Long Term			HC vs Baseline			HC vs 3 Weeks			HC vs 8 Weeks			HC vs Long Term
		Median	Range		Median	Range		Median	Range		Median	Range		Median	Range		P value	Q value		P value	Q value		P value	Q value		P value	Q value
Actinobacteria		0.3	0.1-3		2.5	0.2-14.9		6.3	0.9-13.3		7.3	0.8-18		0.7	0.1-3.4		0.0417	0.0417		0.0007	0.000875		0.0003	0.0005		0.2179	0.272375
Bacteroidetes		32.6	18.6-61.3		0.3	0.2-16.1		0.8	0.3-11.9		0.8	0.3-15.4		23.3	0.2-38.1		0.0001	0.0005		0.0001	0.00025		0.0001	0.00025		0.1039	0.173167
Firmicutes		23.9	7.6-65.4		82.8	55.1-98.7		83.9	66.2-94.9		84.3	56.6-95.9		43.5	14.6-55.6		0.0002	0.0005		0.0001	0.00025		0.0001	0.00025		0.0682	0.173167
Fusobacteria		32.4	0.2-58.3		0.4	0.2-21.9		0.5	0.1-10.5		0.6	0.3-7.3		23.3	14-59.4		0.0012	0.002		0.0012	0.0012		0.0009	0.001125		0.9607	0.9607
Proteobacteria		11.3	3.4-16.4		1.4	0.2-17.2		1.8	0.1-3.7		0.4	0.1-26.7		4.8	1.5-15.6		0.03	0.0375		0.0002	0.000333333		0.0037	0.0037		0.0845	0.173167
CLASS
Bacterial group		HC			SRE Baseline			SRE 3 Weeks			SRE 8 Weeks			SRE Long Term			HC vs Baseline			HC vs 3 Weeks			HC vs 8 Weeks			HC vs Long Term
		Median	Range		Median	Range		Median	Range		Median	Range		Median	Range		P value	Q value		P value	Q value		P value	Q value		P value	Q value
Actinobacteria		0.1	0-2.8		0.1	0-12.8		0.2	0-6.6		0.1	0.1-14.6		0.1	0-2.5		0.2699	0.330611		0.0607	0.0834625		0.0414	0.0628375		0.921	1
Coriobacteriia		0.2	0-2.2		2.1	0-7.9		2.5	0-13.1		5.7	0.1-13.4		0.6	0-3.4		0.1162	0.213033		0.0352	0.0553143		0.0007	0.001925		0.256	0.5632
Bacteroidia		32.6	18.6-61.3		0.3	0.2-16.1		0.8	0.3-11.9		0.8	0.3-15.4		23.3	0.2-38.1		0.0001	0.00055		0.0001	0.00055		0.0001	0.000366667		0.1039	0.380967
Bacilli		0.7	0.3-38		25	0.6-93.3		22	0.5-72.6		6.3	0.6-59.4		5.9	0.6-28.3		0.0056	0.0154		0.0068	0.01496		0.0148	0.0271333		0.139	0.38225
Clostridia		22.1	6.8-28.6		38.5	1.6-97.5		64.8	19.2-91.3		57.1	35.7-90.9		33.9	13.8-43		0.2705	0.330611		0.0009	0.0033		0.0001	0.000366667		0.0433	0.23815
Erysipelotrichi		0.3	0-1.4		0.4	0-4		0.6	0-3.5		0.7	0-2.6		0.2	0-0.7		0.9202	0.9734		0.2426	0.296511		0.1166	0.142511		0.8825	1
Fusobacteriia		32.4	0.2-58.3		0.4	0.2-21.9		0.5	0.1-10.5		0.6	0.3-7.3		23.3	14-59.4		0.0012	0.0044		0.0012	0.0033		0.0009	0.00198		0.9607	1
Alphaproteobacteria		0	0-0		0	0-0.1		0	0-0		0	0-0		0	0-0		0.0819	0.18018		1	1		1	1		1	1
Betaproteobacteria		8	2.8-12.7		0.1	0-1.8		0.5	0.1-2.3		0.1	0-0.7		2.3	0.1-9.7		0.0001	0.00055		0.0001	0.00055		0.0001	0.000366667		0.0266	0.23815
Epsilonproteobacteria		0.2	0-6.5		0	0-1.1		0	0-0.1		0	0-0.5		0.2	0-1.9		0.1774	0.278771		0.0138	0.0253		0.0457	0.0628375		0.4514	0.827567
Gammaproteobacteria		0.5	0.1-10.2		0.2	0.1-17.1		0.4	0-3.6		0.2	0-26		0.1	0-5.8		0.9734	0.9734		0.6642	0.73062		0.5931	0.65241		0.7301	1
ORDER
Bacterial group		HC			SRE Baseline			SRE 3 Weeks			SRE 8 Weeks			SRE Long Term			HC vs Baseline			HC vs 3 Weeks			HC vs 8 Weeks			HC vs Long Term
		Median	Range		Median	Range		Median	Range		Median	Range		Median	Range		P value	Q value		P value	Q value		P value	Q value		P value	Q value
Actinomycetales		0	0-0		0	0-0.7		0	0-0.7		0.1	0-0.6		0	0-0		0.0099	0.02574		0.0009	0.002925		0.0009	0.00195		1	1
Bifidobacteriales		0.1	0-2.8		0.1	0-12.8		0.1	0-6.5		0.1	0-14.6		0.1	0-2.5		0.5029	0.617717		0.2031	0.26403		0.3146	0.340817		0.921	1
Coriobacteriales		0.2	0-2.2		2.1	0-7.9		2.5	0-13.1		5.7	0.1-13.4		0.6	0-3.4		0.1162	0.251767		0.0352	0.0508444		0.0007	0.00195		0.256	0.554667
Bacteroidales		32.6	18.6-61.3		0.3	0.2-16.1		0.8	0.3-11.9		0.8	0.3-15.4		23.3	0.2-38.1		0.0001	0.00065		0.0001	0.00065		0.0001	0.000433333		0.1039	0.27014
Bacillales		0	0-0		0	0-0.1		0	0-0.1		0	0-0.2		0	0-0		0.2294	0.372775		0.0291	0.0472875		0.0291	0.0472875		1	1
Lactobacillales		0.5	0.3-3.7		25	0.5-93.3		20.4	0.5-72.6		5.9	0.5-59.4		5.8	0.6-28.3		0.0017	0.005525		0.0045	0.00975		0.0015	0.00278571		0.0157	0.10205
Turicibacterales		0.1	0-34.3		0.1	0-12.7		0	0-4.4		0	0-1.1		0	0-0		0.5256	0.617717		0.4424	0.479267		0.0662	0.08606		0.0067	0.0871
Clostridiales		22.1	6.8-28.6		38.5	1.6-97.5		64.8	19.2-91.3		57.1	35.7-90.9		33.9	13.8-43		0.2705	0.390722		0.0009	0.002925		0.0001	0.000433333		0.0433	0.140725
Erysipelotrichales		0.3	0-1.4		0.4	0-4		0.6	0-3.5		0.7	0-2.6		0.2	0-0.7		0.9202	0.9202		0.2426	0.286709		0.1166	0.1378		0.8825	1
Fusobacteriales		32.4	0.2-58.3		0.4	0.2-21.9		0.5	0.1-10.5		0.6	0.3-7.3		23.3	14-59.4		0.0012	0.0052		0.0012	0.00312		0.0009	0.00195		0.9607	1
Burkholderiales		8	2.8-12.7		0.1	0-1.8		0.5	0.1-2.3		0.1	0-0.7		2.3	0.1-9.7		0.0001	0.00065		0.0001	0.00065		0.0001	0.000433333		0.0266	0.115267
Campylobacterales		0.2	0-6.5		0	0-1.1		0	0-0.1		0	0-0.5		0.2	0-1.9		0.1774	0.329457		0.0138	0.0256286		0.0457	0.0660111		0.4514	0.838314
Enterobacteriales		0.1	0-10.2		0.2	0.1-17.1		0.3	0-3.6		0.2	0-25.8		0.1	0-5.8		0.5702	0.617717		0.9467	0.9467		0.7893	0.7893		0.9607	1
FAMILY
Bacterial group		HC			SRE Baseline			SRE 3 Weeks			SRE 8 Weeks			SRE Long Term			HC vs Baseline			HC vs 3 Weeks			HC vs 8 Weeks			HC vs Long Term
		Median	Range		Median	Range		Median	Range		Median	Range		Median	Range		P value	Q value		P value	Q value		P value	Q value		P value	Q value
Actinomycetaceae		0	0-0		0	0-0.3		0	0-0.2		0	0-0.1		0	0-0		0.0819	0.149347		0.2294	0.309191		0.0099	0.03069		1	1
Corynebacteriaceae		0	0-0		0	0-0.1		0	0-0.5		0	0-0.3		0	0-0		0.0291	0.09114		0.0031	0.0160167		0.0291	0.0563813		1	1
Microbacteriaceae		0	0-0		0	0-0.1		0	0-0.1		0	0-0.1		0	0-0		0.0819	0.149347		0.2294	0.309191		0.0291	0.0563813		1	1
Micrococcaceae		0	0-0		0	0-0.2		0	0-0.1		0	0-0.1		0	0-0		0.0819	0.149347		0.2294	0.309191		0.0291	0.0563813		1	1
Bifidobacteriaceae		0.1	0-2.8		0.1	0-12.8		0.1	0-6.5		0.1	0-14.6		0.1	0-2.5		0.5029	0.775886		0.2031	0.309191		0.3146	0.424026		0.921	1
Coriobacteriaceae		0.2	0-2.2		2.1	0-7.9		2.5	0-13.1		5.7	0.1-13.4		0.6	0-3.4		0.1162	0.200122		0.0352	0.0839385		0.0007	0.00434		0.256	0.881778
Bacteroidaceae		25.7	0.1-61.1		0.2	0.1-14.9		0.8	0.2-11.8		0.5	0.2-15.3		23.3	0.1-31.3		0.0012	0.00744		0.0024	0.01488		0.0024	0.0093		0.4597	1
Porphyromonadaceae		0	0-1.4		0	0-1.1		0	0-0.3		0	0-0.1		0	0-0.2		0.9637	0.995823		0.7018	0.80577		0.8202	0.8674		0.5745	1
Prevotellaceae		3.6	0.1-22.6		0	0-0.8		0	0-7		0	0-0.1		0	0-4.7		0.0002	0.0031		0.0009	0.0093		0.0001	0.000775		0.0682	0.42284
[Paraprevotellaceae]		1.4	0-8.7		0	0-0.1		0	0-0.8		0	0-0.4		0	0-4		0.0294	0.09114		0.0325	0.0839385		0.0599	0.109229		0.5765	1
Staphylococcaceae		0	0-0		0	0-0		0	0-0.1		0	0-0.2		0	0-0		1	1		0.0291	0.0820091		0.0291	0.0563813		1	1
Enterococcaceae		0.1	0-0.4		0.3	0.2-79.6		0.3	0.1-15.4		0.3	0.2-21.7		0.2	0.1-1.3		0.0024	0.0124		0.0068	0.02635		0.0019	0.00841429		0.1674	0.648675
Lactobacillaceae		0.1	0-3.4		0.4	0.1-92.1		0.2	0-42.5		0.1	0-54.5		0.2	0.1-1.3		0.0083	0.0321625		0.133	0.242529		0.8674	0.8674		0.1529	0.648675
Leuconostocaceae		0	0-0		0	0-0.3		0	0-0		0	0-0.1		0	0-0		0.0819	0.149347		0.0819	0.16926		0.0819	0.133626		1	1
Streptococcaceae		0.2	0-1		0.4	0.2-19.8		5	0.2-71.5		0.4	0.2-16.5		4.4	0.3-27.6		0.0488	0.137527		0.0178	0.05518		0.0231	0.0563813		0.0266	0.274867
Turicibacteraceae		0.1	0-34.3		0.1	0-12.7		0	0-4.4		0	0-1.1		0	0-0		0.5256	0.775886		0.4424	0.527477		0.0662	0.114011		0.0067	0.2077
o__Clostridiales;__		0	0-0.7		0	0-2.6		0	0-0.1		0	0-0.2		0	0-0		0.6914	0.857336		0.7797	0.833472		0.7797	0.8674		0.3668	1
o__Clostridiales;f__		0.2	0-0.8		0.1	0-10.2		0.6	0-1.3		0.5	0-0.6		0.4	0-0.6		0.8667	0.959561		0.2993	0.371132		0.867	0.8674		0.9606	1
Clostridiaceae		2.7	0.9-13.7		5.1	0.3-37.4		12.9	1.2-35.8		16.4	10.8-25.2		5.1	2.5-14.3		0.6642	0.857336		0.0056	0.0248		0.0001	0.000775		0.0845	0.436583
Lachnospiraceae		4.4	1.5-13.2		21.4	0.9-82.9		28.1	5.8-73		27.4	14.3-75.1		6.5	4.6-21.8		0.1511	0.246532		0.0004	0.0062		0.0001	0.000775		0.0682	0.42284
Peptococcaceae		0	0-0.4		0	0-0		0	0-0.8		0	0-1.7		0	0-0		0.8409	0.959561		0.738	0.817071		0.124	0.183048		0.5351	1
Peptostreptococcaceae		0	0-0.9		0	0-0.3		0.3	0-5		0	0-4.7		0	0-0.1		0.5876	0.791983		0.058	0.128429		0.349	0.450792		0.5745	1
Ruminococcaceae		5.5	0.2-15.7		0.2	0-7.3		6.3	0.1-15.3		1.4	0.2-3.5		4	0.1-9		0.0068	0.0301143		0.8152	0.842373		0.0056	0.0192889		0.4021	1
Veillonellaceae		4.5	0.4-10.8		0.3	0.1-4.5		1.7	0.1-12		1.8	0.1-23.1		4	0.1-19.9		0.0012	0.00744		0.133	0.242529		0.4039	0.500836		0.6573	1
[Tissierellaceae]		0	0-0		0	0-0.1		0	0-0		0	0-0		0	0-0		0.0819	0.149347		0.2294	0.309191		0.2294	0.323245		1	1
Erysipelotrichaceae		0.3	0-1.4		0.4	0-4		0.6	0-3.5		0.7	0-2.6		0.2	0-0.7		0.9202	0.983662		0.2426	0.313358		0.1166	0.18073		0.8825	1
Fusobacteriaceae		32.4	0.2-58.3		0.4	0.2-21.9		0.5	0.1-10.5		0.6	0.3-7.3		23.3	14-59.4		0.0012	0.00744		0.0012	0.0093		0.0009	0.00465		0.9607	1
Alcaligenaceae		8	2.8-12.7		0.1	0-1.8		0.5	0.1-2.3		0.1	0-0.7		2.3	0.1-9.7		0.0001	0.0031		0.0001	0.0031		0.0001	0.000775		0.0266	0.274867
Campylobacteraceae		0	0-0.2		0	0-1.1		0	0-0		0	0-0		0	0-0.1		0.8667	0.959561		0.2284	0.309191		0.6914	0.824362		0.82	1
Helicobacteraceae		0.2	0-6.5		0	0-0.5		0	0-0.1		0	0-0.5		0.2	0-1.8		0.0778	0.149347		0.0138	0.0475333		0.0146	0.0411455		0.5808	1
Enterobacteriaceae		0.1	0-10.2		0.2	0.1-17.1		0.3	0-3.6		0.2	0-25.8		0.1	0-5.8		0.5702	0.791983		0.9467	0.9467		0.7893	0.8674		0.9607	1
GENUS
Bacterial group		HC			SRE Baseline			SRE 3 Weeks			SRE 8 Weeks			SRE Long Term			HC vs Baseline			HC vs 3 Weeks			HC vs 8 Weeks			HC vs Long Term
		Median	Range		Median	Range		Median	Range		Median	Range		Median	Range		P value	Q value		P value	Q value		P value	Q value		P value	Q value
Actinomyces		0	0-0		0	0-0.3		0	0-0.2		0	0-0.1		0	0-0		0.0819	0.215747		0.2294	0.3441		0.0099	0.0297		1	1
Corynebacterium		0	0-0		0	0-0.1		0	0-0.5		0	0-0.3		0	0-0		0.0291	0.1164		0.0031	0.0165333		0.0291	0.0634909		1	1
f__Microbacteriaceae;__		0	0-0		0	0-0.1		0	0-0.1		0	0-0.1		0	0-0		0.0819	0.215747		0.2294	0.3441		0.0291	0.0634909		1	1
Bifidobacterium		0.1	0-2.8		0.1	0-12.8		0.1	0-6.5		0.1	0-14.6		0.1	0-2.5		0.9466	1		0.2031	0.3441		0.3146	0.487123		0.921	1
Collinsella		0.2	0-2.2		0.6	0-7.3		2.5	0-12.8		5.6	0.1-13.4		0.6	0-3.4		0.242	0.529309		0.0352	0.0938667		0.0007	0.0042		0.256	0.613257
Slackia		0	0-0.1		0	0-0.3		0	0-0.3		0	0-0.3		0	0-0		0.3717	0.6372		0.1576	0.290954		0.1352	0.240356		0.2551	0.613257
Bacteroides		25.7	0.1-61.1		0.2	0.1-14.9		0.8	0.2-11.8		0.5	0.2-15.3		23.3	0.1-31.3		0.0012	0.0104		0.0024	0.0164571		0.0024	0.01152		0.4597	0.819953
Parabacteroides		0	0-1.4		0	0-1.1		0	0-0.3		0	0-0.1		0	0-0.2		0.9637	1		0.7018	0.84216		0.8202	0.925227		0.5745	0.819953
Prevotella		3.6	0.1-22.6		0	0-0.8		0	0-7		0	0-0.1		0	0-4.7		0.0002	0.0048		0.0009	0.0144		0.0001	0.0012		0.0682	0.467657
[Prevotella]		0.5	0-8.7		0	0-0.1		0	0-0.8		0	0-0.4		0	0-4		0.0227	0.0990545		0.0386	0.0975158		0.081	0.162		0.7223	0.922232
Staphyloccus		0	0-0		0	0-0		0	0-0.1		0	0-0.2		0	0-0		1	1		0.0291	0.0847059		0.0291	0.0634909		1	1
Enterococcus		0.1	0-0.4		0.3	0.2-79.6		0.3	0.1-15.4		0.3	0.2-21.7		0.2	0.1-1.3		0.0007	0.0104		0.0019	0.0152		0.0006	0.00411429		0.0936	0.4992
f__Lactobacillaceae;__		0	0-0		0	0-0		0	0-0		0	0-0		0	0-0.3		1	1		1	1		1	1		0.019	0.304
Lactobacillus		0.1	0-3.4		0.4	0.1-92.1		0.2	0-42.5		0.1	0-54.5		0.2	0.1-1		0.0083	0.03984		0.133	0.25536		0.8674	0.925227		0.2179	0.581067
Streptococcus		0.2	0-1		0.4	0.2-19.8		5	0.2-71.5		0.4	0.2-16.5		4.4	0.2-27.6		0.0488	0.180185		0.0178	0.0610286		0.0231	0.0616		0.0546	0.4368
Turicibacter		0.1	0-34.3		0.1	0-12.7		0	0-4.4		0	0-1.1		0	0-0		0.5256	0.813832		0.4424	0.589867		0.0662	0.138157		0.0067	0.304
o__Clostridiales;__;__		0	0-0.7		0	0-2.6		0	0-0.1		0	0-0.2		0	0-0		0.6914	0.932211		0.7797	0.870363		0.7797	0.925227		0.3668	0.765496
o__Clostridiales;f__;g__		0.2	0-0.8		0.1	0-10.2		0.6	0-1.3		0.5	0-0.6		0.4	0-0.6		0.8667	1		0.2993	0.422541		0.867	0.925227		0.9606	1
f__Clostridiaceae;__		1.9	0.2-11.2		1.8	0.3-37.3		11.7	1-26.5		16.1	9.7-25.1		3.1	0.6-14.3		0.9202	1		0.0045	0.0216		0.0001	0.0012		0.349	0.761455
f__Clostridiaceae;g__		0	0-2.5		0	0-0.4		0	0-1.2		0	0-1		0	0-2		0.7154	0.932211		0.8268	0.894507		0.8028	0.925227		0.9138	1
Clostridium		0	0-1.2		0.1	0-7.2		0.1	0-9.6		0.1	0-0.9		0.1	0-2.5		0.3159	0.5832		0.483	0.626595		0.1185	0.22752		0.5705	0.819953
f__Lachnospiraceae;__		1.6	0.3-5		4.9	0.2-25		8.7	1-61.2		6	3.1-62.3		3.1	1.6-7.3		0.2426	0.529309		0.0015	0.0144		0.0003	0.00288		0.0845	0.4992
f__Lachnospiraceae;g__		0.8	0.2-1.8		2	0-9.9		2.7	0.5-5.3		3.2	1.3-10.7		1.2	0.3-8		0.2705	0.554496		0.003	0.0165333		0.0005	0.004		0.7301	0.922232
Blautia		1.4	0.4-4.2		2.9	0.2-32.9		10.5	1.8-25.8		11.2	7.5-46.2		1.7	1.1-6.9		0.3673	0.6372		0.0005	0.012		0.0001	0.0012		0.4021	0.8042
Coprococcus		0	0-0.3		0.1	0-1.2		0.1	0-0.3		0.2	0-0.6		0	0-0		0.0801	0.215747		0.0069	0.0276		0.0062	0.02208		0.1759	0.56288
Dorea		0	0-0.3		0	0-0.4		0	0-0.3		0.1	0-0.4		0	0-0		0.3888	0.643531		0.4313	0.589867		0.1772	0.293297		0.1186	0.531771
[Ruminococcus]		0.7	0.1-5.3		3.6	0.1-20.8		2.1	0.3-13.2		3.4	0.5-8.3		1.3	0.6-6.9		0.5703	0.829527		0.03	0.0847059		0.0056	0.02208		0.1529	0.531771
Peptococcus		0	0-0.4		0	0-0		0	0-0.8		0	0-1.7		0	0-0		0.8409	1		0.738	0.857486		0.124	0.228923		0.5351	0.819953
f__Peptostreptococcaceae;__		0	0-0.2		0	0-0.3		0	0-0.6		0	0-0.3		0	0-0		0.738	0.932211		0.124	0.248		0.1502	0.257486		0.5351	0.819953
f__Peptostreptococcaceae;g__		0	0-0.9		0	0-0.3		0.3	0-4.5		0	0-4.3		0	0-0.1		0.9678	1		0.0683	0.16392		0.5876	0.829553		0.5745	0.819953
f__Ruminococcaceae;g__		0.6	0.1-2.9		0	0-2		0.1	0-0.9		0.2	0-0.4		0.2	0-0.8		0.0082	0.03984		0.0068	0.0276		0.0037	0.0161455		0.1529	0.531771
Faecalibacterium		4.4	0-14.9		0.1	0-2.9		5.2	0-15.2		1.1	0.1-3		3.2	0-8.9		0.0013	0.0104		0.6642	0.817477		0.0068	0.02208		0.554	0.819953
Oscillospira		0	0-0.3		0	0-0.1		0	0-0.2		0	0-0.3		0	0-0.1		0.4677	0.74832		0.528	0.666947		0.8087	0.925227		0.1551	0.531771
Ruminococcus		0	0-0.1		0	0-4.6		0	0-0.1		0	0-0.1		0	0-0		0.6945	0.932211		0.0961	0.205357		0.8606	0.925227		0.2683	0.613257
Megamonas		3.8	0-9.2		0.2	0.1-4.5		1	0.1-11.3		1.8	0.1-23.1		4	0.1-19.9		0.0045	0.0294		0.2167	0.3441		0.6165	0.845486		0.4597	0.819953
Phascolarctobacterium		0.5	0-3		0	0-0.5		0	0-1.1		0	0-0.5		0	0-1.2		0.0049	0.0294		0.0984	0.205357		0.0069	0.02208		0.1487	0.531771
f__Erysipelotrichaceae;g__		0	0-0.2		0	0-0.2		0.1	0-0.6		0	0-1.1		0	0-0.3		0.7359	0.932211		0.8386	0.894507		0.9729	1		0.688	0.917333
Allobaculum		0	0-0.6		0	0-1.1		0	0-1.1		0	0-0.6		0	0-0.2		0.1229	0.29496		0.2515	0.365818		0.2261	0.36176		0.688	0.917333
Catenibacterium		0.1	0-0.7		0	0-1.9		0	0-1.3		0	0-1.8		0	0-0.3		0.0854	0.215747		0.9729	0.9936		0.709	0.919784		0.1973	0.581067
Coprobacillus		0	0-0		0	0-0.2		0	0-0.1		0	0-0.1		0	0-0		0.0819	0.215747		0.0291	0.0847059		0.0291	0.0634909		1	1
[Eubacterium]		0	0-0.6		0	0-0.9		0.1	0-1.3		0.1	0-1.5		0	0-0.3		0.2888	0.554496		0.0947	0.205357		0.4416	0.6624		0.4875	0.819953
f__Fusobacteriaceae;__		0	0-0		0	0-0		0	0-0.1		0	0-0		0	0-0.2		1	1		0.2294	0.3441		1	1		0.019	0.304
Cetobacterium		0	0-0.1		0	0-0.1		0	0-0		0	0-0.1		0	0-56		0.2779	0.554496		0.7503	0.857486		0.4924	0.716218		0.0381	0.36576
Fusobacterium		32.3	0.2-58.3		0.4	0.1-21.9		0.4	0.1-10.5		0.6	0.3-7.3		20.3	3.2-38.1		0.0012	0.0104		0.0012	0.0144		0.0009	0.0048		0.2179	0.581067
Sutterella		8	2.8-12.7		0.1	0-1.8		0.5	0.1-2.3		0.1	0-0.7		2.3	0.1-9.7		0.0001	0.0048		0.0001	0.0048		0.0001	0.0012		0.0266	0.3192
Campylobacter		0	0-0.2		0	0-1.1		0	0-0		0	0-0		0	0-0.1		0.8667	1		0.2284	0.3441		0.6914	0.919784		0.82	1
Helicobacter		0.2	0-6.5		0	0-0.5		0	0-0.1		0	0-0.5		0.2	0-1.8		0.0778	0.215747		0.0138	0.0509538		0.0146	0.0412235		0.5808	0.819953
f__Enterobacteriaceae;g__		0.1	0-10.1		0.2	0.1-17		0.3	0-3.6		0.2	0-25.8		0.1	0-5.8		0.5702	0.829527		0.9467	0.987861		0.7893	0.925227		0.9607	1
SPECIES
Bacterial group		HC			SRE Baseline			SRE 3 Weeks			SRE 8 Weeks			SRE Long Term			HC vs Baseline			HC vs 3 Weeks			HC vs 8 Weeks			HC vs Long Term
		Median	Range		Median	Range		Median	Range		Median	Range		Median	Range		P value	Q value		P value	Q value		P value	Q value		P value	Q value
g__Actinomyces;s__		0	0-0		0	0-0.3		0	0-0.2		0	0-0.1		0	0-0		0.0819	0.221264		0.2294	0.3534		0.0099	0.03135		1	1
g__Corynebacterium;s__		0	0-0		0	0-0.1		0	0-0.5		0	0-0.3		0	0-0		0.0291	0.11058		0.0031	0.01767		0.0291	0.0637962		1	1
f__Microbacteriaceae;__;__		0	0-0		0	0-0.1		0	0-0.1		0	0-0.1		0	0-0		0.0819	0.221264		0.2294	0.3534		0.0291	0.0637962		1	1
g__Bifidobacterium;s__		0.1	0-0.2		0.1	0-12.8		0.1	0-6.5		0.1	0-14.6		0.1	0-2.5		0.9466	1		0.1595	0.293274		0.3146	0.512349		0.8428	0.9804
Collinsella stercoris		0.2	0-2.2		0.6	0-7.3		2.4	0-12.8		4.1	0.1-13.4		0.6	0-3.4		0.3666	0.651979		0.0352	0.10032		0.0007	0.00443333		0.256	0.66025
g__Slackia;s__		0	0-0.1		0	0-0.3		0	0-0.3		0	0-0.3		0	0-0		0.3717	0.651979		0.1576	0.293274		0.1352	0.25688		0.2551	0.66025
g__Bacteroides;__		9.9	0.1-29.3		0.1	0-3.2		0.1	0-9.9		0.1	0-7.5		6.9	0.1-22.1		0.0024	0.0228		0.0123	0.04674		0.0056	0.0228		0.5877	0.930525
g__Bacteroides;s__		6.6	0.1-46.7		0.1	0-6.7		0.3	0-1.7		0.2	0-11.3		3.5	0-14.4		0.0037	0.0301286		0.0005	0.012825		0.0212	0.0575429		0.7301	0.931127
Bacteroides plebeius		2.1	0-12		0.1	0-7.6		0.1	0-2.9		0.1	0-1.7		0.7	0-9.6		0.0171	0.0749769		0.0147	0.0523687		0.0212	0.0575429		0.5869	0.930525
Bacteroides uniformis		0	0-1.9		0	0-0.4		0	0-0.4		0	0-0.3		0	0-0.2		0.3397	0.64543		0.3397	0.484073		0.9036	0.990485		0.6624	0.931127
g__Parabacteroides;s__		0	0-1.2		0	0-0.2		0	0-0.3		0	0-0.1		0	0-0		0.4567	0.740525		0.9637	1		0.8202	0.988836		0.7351	0.931127
Prevotella copri		3.6	0.1-22.6		0	0-0.8		0	0-7		0	0-0.1		0	0-4.7		0.0002	0.0057		0.0009	0.012825		0.0001	0.001425		0.0682	0.431933
g__[Prevotella];s__		0.5	0-8.7		0	0-0.1		0	0-0.8		0	0-0.4		0	0-4		0.0227	0.0924214		0.0386	0.104771		0.081	0.164893		0.7223	0.931127
g__Staphylococcus;s__		0	0-0		0	0-0		0	0-0.1		0	0-0.2		0	0-0		1	1		0.0291	0.0873		0.0291	0.0637962		1	1
g__Enterococcus;s__		0.1	0-0.4		0.3	0.2-79.6		0.3	0.1-15.4		0.3	0.2-21.7		0.2	0.1-1.3		0.0007	0.0133		0.0019	0.0135375		0.0006	0.004275		0.0936	0.4446
f__Lactobacillaceae;__;__		0	0-0		0	0-0		0	0-0		0	0-0		0	0-0.3		1	1		1	1		1	1		0.019	0.27075
g__Lactobacillus;__		0	0-0		0	0-0.4		0	0-0.2		0	0-0		0	0-0.1		0.2294	0.512156		0.2294	0.3534		1	1		0.019	0.27075
g__Lactobacillus;s__		0.1	0-3.4		0.4	0.1-91.6		0.2	0-42.2		0.1	0-54.5		0.2	0.1-0.9		0.0083	0.0430091		0.133	0.261414		0.8674	0.988836		0.278	0.66025
g__Streptococcus;s__		0.2	0-1		0.4	0.2-19.8		5	0.2-71.5		0.4	0.2-16.5		4.4	0.2-27.6		0.0488	0.166641		0.0178	0.0596824		0.0231	0.05985		0.0546	0.389025
g__Turicibacter;s__		0.1	0-34.3		0.1	0-12.7		0	0-4.4		0	0-1.1		0	0-0		0.5256	0.768477		0.4424	0.586437		0.0662	0.139756		0.0067	0.27075
o__Clostridiales;__;__;__		0	0-0.7		0	0-2.6		0	0-0.1		0	0-0.2		0	0-0		0.6914	0.914478		0.7797	0.888858		0.7797	0.988836		0.3668	0.774356
o__Clostridiales;f__;g__;s__		0.2	0-0.8		0.1	0-10.2		0.6	0-1.3		0.5	0-0.6		0.4	0-0.6		0.8667	1		0.2993	0.437438		0.867	0.988836		0.9606	1
f__Clostridiaceae;__;__		1.9	0.2-11.2		1.8	0.3-37.3		11.7	1-26.5		16.1	9.7-25.1		3.1	0.6-14.3		0.9202	1		0.0045	0.0233182		0.0001	0.001425		0.349	0.765115
f__Clostridiaceae;g__;s__		0	0-2.5		0	0-0.4		0	0-1.2		0	0-1		0	0-2		0.7154	0.914478		0.8268	0.919235		0.8028	0.988836		0.9138	1
g__Clostridium;__		0	0-0.8		0	0-6.8		0	0-9.2		0	0-0.1		0	0-0.1		0.2416	0.512156		0.4189	0.582373		0.9637	1		0.8391	0.9804
Clostridium perfringens		0	0-0.3		0	0-6.9		0	0-0.4		0.1	0-0.9		0	0-2.5		0.7163	0.914478		1	1		0.2687	0.450468		0.6948	0.931127
f__Lachnospiraceae;__;__		1.6	0.3-5		4.9	0.2-25		8.7	1-61.2		6	3.1-62.3		3.1	1.6-7.3		0.2426	0.512156		0.0015	0.0135375		0.0003	0.00342		0.0845	0.4446
f__Lachnospiraceae;g__;s__		0.8	0.2-1.8		2	0-9.9		2.7	0.5-5.3		3.2	1.3-10.7		1.2	0.3-8		0.2705	0.546217		0.003	0.01767		0.0005	0.00407143		0.7301	0.931127
g__Blautia;s__		0.6	0-2.1		0.9	0.1-17.2		5.6	0.3-20.6		4.3	2.1-35.6		0.6	0.4-3.8		0.2426	0.512156		0.0019	0.0135375		0.0001	0.001425		0.6573	0.931127
Blautia producta		1	0.3-2.1		2.1	0.1-28.3		5.1	1.2-11		6.5	1.2-10.6		1.1	0.6-6.1		0.4832	0.744389		0.0007	0.012825		0.0005	0.00407143		0.4301	0.875561
g__Coprococcus;s__		0	0-0.3		0.1	0-1.2		0.1	0-0.3		0.2	0-0.6		0	0-0		0.0801	0.221264		0.0069	0.0280929		0.0062	0.0231353		0.1759	0.589782
g__Dorea;s__		0	0-0.3		0	0-0.3		0	0-0.3		0.1	0-0.4		0	0-0		0.3888	0.651979		0.4313	0.585336		0.1772	0.315638		0.1186	0.520015
g__[Ruminococcus];__		0.1	0-1.1		0	0-0.8		0	0-0.4		0	0-0.4		0	0-0.7		0.972	1		0.4657	0.603293		0.4223	0.668642		0.7965	0.9804
g__[Ruminococcus];s__		0	0-1.3		0	0-1.4		0.3	0.1-1.1		0.3	0.1-1.2		0.1	0-0.2		0.3889	0.651979		0.0063	0.0280929		0.0026	0.0134727		0.3406	0.765115
[Ruminococcus] gnavus		0.6	0.1-4		1.7	0.1-20.8		1.6	0.2-13.2		3	0.4-7.1		1.1	0.3-6.9		0.5258	0.768477		0.1018	0.214911		0.0056	0.0228		0.2179	0.621015
g__Peptococcus;s__		0	0-0.4		0	0-0		0	0-0.8		0	0-1.7		0	0-0		0.8409	1		0.738	0.872798		0.124	0.243724		0.5351	0.930525
f__Peptostreptococcaceae;__;__		0	0-0.2		0	0-0.3		0	0-0.6		0	0-0.3		0	0-0		0.738	0.914478		0.124	0.252429		0.1502	0.276174		0.5351	0.930525
f__Peptostreptococcaceae;g__;s__		0	0-0.9		0	0-0.3		0.3	0-4.5		0	0-4.3		0	0-0.1		0.9678	1		0.0683	0.169265		0.5876	0.8588		0.5745	0.930525
f__Ruminococcaceae;g__;s__		0.6	0.1-2.9		0	0-2		0.1	0-0.9		0.2	0-0.4		0.2	0-0.8		0.0082	0.0430091		0.0068	0.0280929		0.0037	0.017575		0.1529	0.552544
Faecalibacterium prausnitzii		4.4	0-14.9		0.1	0-2.9		5.2	0-15.2		1.1	0.1-3		3.2	0-8.9		0.0013	0.01482		0.6642	0.805519		0.0068	0.0231353		0.554	0.930525
g__Oscillospira;s__		0	0-0.3		0	0-0.1		0	0-0.2		0	0-0.3		0	0-0.1		0.4677	0.740525		0.528	0.6688		0.8087	0.988836		0.1551	0.552544
g__Ruminococcus;s__		0	0-0.1		0	0-4.5		0	0-0.1		0	0-0.1		0	0-0		0.6945	0.914478		0.0961	0.214911		0.8606	0.988836		0.2683	0.66025
g__Megamonas;s__		3.8	0-9.2		0.2	0.1-4.5		1	0.1-11.3		1.8	0.1-23.1		4	0.1-19.9		0.0045	0.0310333		0.2167	0.3534		0.6165	0.878513		0.4597	0.903548
g__Phascolarctobacterium;s__		0.5	0-3		0	0-0.5		0	0-1.1		0	0-0.5		0	0-1.2		0.0049	0.0310333		0.0984	0.214911		0.0069	0.0231353		0.1487	0.552544
f__Erysipelotrichaceae;g__;s__		0	0-0.2		0	0-0.2		0.1	0-0.6		0	0-1.1		0	0-0.3		0.7359	0.914478		0.8386	0.919235		0.9729	1		0.688	0.931127
g__Allobaculum;s__		0	0-0.6		0	0-1.1		0	0-1.1		0	0-0.6		0	0-0.2		0.1229	0.304578		0.2515	0.37725		0.2261	0.390536		0.688	0.931127
g__Catenibacterium;s__		0.1	0-0.7		0	0-1.9		0	0-1.3		0	0-1.8		0	0-0.3		0.0854	0.221264		0.9729	1		0.709	0.962214		0.1973	0.621015
g__Coprobacillus;s__		0	0-0		0	0-0.2		0	0-0.1		0	0-0.1		0	0-0		0.0819	0.221264		0.0291	0.0873		0.0291	0.0637962		1	1
[Eubacterium] biforme		0	0-0.6		0	0-0.9		0	0-1.1		0.1	0-1.5		0	0-0		0.0497	0.166641		0.6077	0.75302		0.4971	0.74565		0.0886	0.4446
[Eubacterium] dolichum		0	0-0.1		0	0-0.3		0	0-1.3		0	0-0.1		0	0-0.3		0.9322	1		0.0488	0.126436		0.9036	0.990485		0.4811	0.91409
f__Fusobacteriaceae;__;__		0	0-0		0	0-0		0	0-0.1		0	0-0		0	0-0.2		1	1		0.2294	0.3534		1	1		0.019	0.27075
Cetobacterium somerae		0	0-0.1		0	0-0.1		0	0-0		0	0-0.1		0	0-56		0.2779	0.546217		0.7503	0.872798		0.4924	0.74565		0.0381	0.36195
g__Fusobacterium;s__		32.3	0.2-58.3		0.4	0.1-21.9		0.4	0.1-10.5		0.6	0.3-7.3		20.3	3.2-38.1		0.0012	0.01482		0.0012	0.0135375		0.0009	0.00513		0.2179	0.621015
g__Sutterella;s__		8	2.8-12.7		0.1	0-1.8		0.5	0.1-2.3		0.1	0-0.7		2.3	0.1-9.7		0.0001	0.0057		0.0001	0.0057		0.0001	0.001425		0.0266	0.30324
g__Campylobacter;s__		0	0-0.2		0	0-1.1		0	0-0		0	0-0		0	0-0.1		0.8667	1		0.2284	0.3534		0.6914	0.961215		0.82	0.9804
g__Helicobacter;s__		0.1	0-1.3		0	0-0		0	0-0.1		0	0-0		0	0-0		0.011	0.05225		0.0919	0.214911		0.011	0.033		0.0498	0.389025
f__Enterobacteriaceae;g__;s__		0.1	0-10.1		0.2	0.1-17		0.3	0-3.6		0.2	0-25.8		0.1	0-5.8		0.5702	0.812535		0.9467	1		0.7893	0.988836		0.9607	1

## Sheet: SRE over time
PHYLUM
Bacterial group		SRE Baseline			SRE 3 Weeks			SRE 8 Weeks			SRE Long Term			SRE Baseline vs SRE 3 Weeks vs SRE 8 Weeks vs SRE Long Term
		Median	Range		Median	Range		Median	Range		Median	Range		P value	Q value
Actinobacteria		2.5a,b	0.2-14.9		6.3a	0.9-13.3		7.3a	0.8-18		0.7b	0.1-3.4		0.0055	0.01375
Bacteroidetes		0.3	0.2-16.1		0.8	0.3-11.9		0.8	0.3-15.4		23.3	0.2-38.1		0.2697	0.2697
Firmicutes		82.8a,b	55.1-98.7		83.9a	66.2-94.9		84.3a	56.6-95.9		43.5b	14.6-55.6		0.0055	0.01375
Fusobacteria		0.4a,b	0.2-21.9		0.5a	0.1-10.5		0.6a,b	0.3-7.3		23.3b	14-59.4		0.0443	0.0738333
Proteobacteria		1.4	0.2-17.2		1.8	0.1-3.7		0.4	0.1-26.7		4.8	1.5-15.6		0.1616	0.202
CLASS
Bacterial group		SRE Baseline			SRE 3 Weeks			SRE 8 Weeks			SRE Long Term			SRE Baseline vs SRE 3 Weeks vs SRE 8 Weeks vs SRE Long Term
		Median	Range		Median	Range		Median	Range		Median	Range		P value	Q value
Actinobacteria		0.1a,b	0-12.8		0.2a	0-6.6		0.1a,b	0.1-14.6		0.1b	0-2.5		0.0167	0.1837
Coriobacteriia		2.1	0-7.9		2.5	0-13.1		5.7	0.1-13.4		0.6	0-3.4		0.1163	0.296267
Bacteroidia		0.3	0.2-16.1		0.8	0.3-11.9		0.8	0.3-15.4		23.3	0.2-38.1		0.2697	0.329633
Bacilli		25	0.6-93.3		22	0.5-72.6		6.3	0.6-59.4		5.9	0.6-28.3		0.9999	0.9999
Clostridia		38.5	1.6-97.5		64.8	19.2-91.3		57.1	35.7-90.9		33.9	13.8-43		0.1232	0.296267
Erysipelotrichi		0.4	0-4		0.6	0-3.5		0.7	0-2.6		0.2	0-0.7		0.1616	0.296267
Fusobacteriia		0.4a,b	0.2-21.9		0.5a	0.1-10.5		0.6a,b	0.3-7.3		23.3b	14-59.4		0.0443	0.24365
Alphaproteobacteria		0	0-0.1		0	0-0		0	0-0		0	0-0		0.25	0.329633
Betaproteobacteria		0.1	0-1.8		0.5	0.1-2.3		0.1	0-0.7		2.3	0.1-9.7		0.2096	0.329371
Epsilonproteobacteria		0	0-1.1		0	0-0.1		0	0-0.5		0.2	0-1.9		0.1354	0.296267
Gammaproteobacteria		0.2	0.1-17.1		0.4	0-3.6		0.2	0-26		0.1	0-5.8		0.9438	0.9999
ORDER
Bacterial group		SRE Baseline			SRE 3 Weeks			SRE 8 Weeks			SRE Long Term			SRE Baseline vs SRE 3 Weeks vs SRE 8 Weeks vs SRE Long Term
		Median	Range		Median	Range		Median	Range		Median	Range		P value	Q value
Actinomycetales		0a,b	0-0.7		0a	0-0.7		0.1a,b	0-0.6		0b	0-0		0.0084	0.1092
Bifidobacteriales		0.1	0-12.8		0.1	0-6.5		0.1	0-14.6		0.1	0-2.5		0.298	0.42536
Coriobacteriales		2.1	0-7.9		2.5	0-13.1		5.7	0.1-13.4		0.6	0-3.4		0.1163	0.350133
Bacteroidales		0.3	0.2-16.1		0.8	0.3-11.9		0.8	0.3-15.4		23.3	0.2-38.1		0.2697	0.42536
Bacillales		0	0-0.1		0	0-0.1		0	0-0.2		0	0-0		0.5	0.590909
Lactobacillales		25	0.5-93.3		20.4	0.5-72.6		5.9	0.5-59.4		5.8	0.6-28.3		0.9746	0.9746
Turicibacterales		0.1	0-12.7		0	0-4.4		0	0-1.1		0	0-0		0.3272	0.42536
Clostridiales		38.5	1.6-97.5		64.8	19.2-91.3		57.1	35.7-90.9		33.9	13.8-43		0.1232	0.350133
Erysipelotrichales		0.4	0-4		0.6	0-3.5		0.7	0-2.6		0.2	0-0.7		0.1616	0.350133
Fusobacteriales		0.4a,b	0.2-21.9		0.5a	0.1-10.5		0.6a,b	0.3-7.3		23.3b	14-59.4		0.0443	0.28795
Burkholderiales		0.1	0-1.8		0.5	0.1-2.3		0.1	0-0.7		2.3	0.1-9.7		0.2096	0.389257
Campylobacterales		0	0-1.1		0	0-0.1		0	0-0.5		0.2	0-1.9		0.1354	0.350133
Enterobacteriales		0.2	0.1-17.1		0.3	0-3.6		0.2	0-25.8		0.1	0-5.8		0.9438	0.9746
FAMILY
Bacterial group		SRE Baseline			SRE 3 Weeks			SRE 8 Weeks			SRE Long Term			SRE Baseline vs SRE 3 Weeks vs SRE 8 Weeks vs SRE Long Term
		Median	Range		Median	Range		Median	Range		Median	Range		P value	Q value
Actinomycetaceae		0	0-0.3		0	0-0.2		0	0-0.1		0	0-0		0.4375	0.753472
Corynebacteriaceae		0a	0-0.1		0a	0-0.5		0a	0-0.3		0a	0-0		0.0299	0.457767
Microbacteriaceae		0	0-0.1		0	0-0.1		0	0-0.1		0	0-0		0.6875	0.8525
Micrococcaceae		0	0-0.2		0	0-0.1		0	0-0.1		0	0-0		0.75	0.861111
Bifidobacteriaceae		0.1	0-12.8		0.1	0-6.5		0.1	0-14.6		0.1	0-2.5		0.298	0.577763
Coriobacteriaceae		2.1	0-7.9		2.5	0-13.1		5.7	0.1-13.4		0.6	0-3.4		0.1163	0.50096
Bacteroidaceae		0.2	0.1-14.9		0.8	0.2-11.8		0.5	0.2-15.3		23.3	0.1-31.3		0.1514	0.50096
Porphyromonadaceae		0	0-1.1		0	0-0.3		0	0-0.1		0	0-0.2		0.7431	0.861111
Prevotellaceae		0	0-0.8		0	0-7		0	0-0.1		0	0-4.7		0.8794	0.908713
[Paraprevotellaceae]		0	0-0.1		0	0-0.8		0	0-0.4		0	0-4		0.25	0.553571
Staphylococcaceae		0	0-0		0	0-0.1		0	0-0.2		0	0-0		0.25	0.553571
Enterococcaceae		0.3	0.2-79.6		0.3	0.1-15.4		0.3	0.2-21.7		0.2	0.1-1.3		0.1514	0.50096
Lactobacillaceae		0.4	0.1-92.1		0.2	0-42.5		0.1	0-54.5		0.2	0.1-1.3		0.8566	0.908713
Leuconostocaceae		0	0-0.3		0	0-0		0	0-0.1		0	0-0		0.625	0.8525
Streptococcaceae		0.4	0.2-19.8		5	0.2-71.5		0.4	0.2-16.5		4.4	0.3-27.6		0.1232	0.50096
Turicibacteraceae		0.1	0-12.7		0	0-4.4		0	0-1.1		0	0-0		0.3272	0.596659
o__Clostridiales;__		0	0-2.6		0	0-0.1		0	0-0.2		0	0-0		0.6667	0.8525
o__Clostridiales;f__		0.1	0-10.2		0.6	0-1.3		0.5	0-0.6		0.4	0-0.6		0.4804	0.775
Clostridiaceae		5.1	0.3-37.4		12.9	1.2-35.8		16.4	10.8-25.2		5.1	2.5-14.3		0.0933	0.50096
Lachnospiraceae		21.4a	0.9-82.9		28.1a	5.8-73		27.4a	14.3-75.1		6.5a	4.6-21.8		0.0336	0.457767
Peptococcaceae		0	0-0		0	0-0.8		0	0-1.7		0	0-0		0.625	0.8525
Peptostreptococcaceae		0	0-0.3		0.3	0-5		0	0-4.7		0	0-0.1		0.0608	0.4712
Ruminococcaceae		0.2	0-7.3		6.3	0.1-15.3		1.4	0.2-3.5		4	0.1-9		0.2982	0.577763
Veillonellaceae		0.3	0.1-4.5		1.7	0.1-12		1.8	0.1-23.1		4	0.1-19.9		0.6522	0.8525
[Tissierellaceae]		0	0-0.1		0	0-0		0	0-0		0	0-0		0.875	0.908713
Erysipelotrichaceae		0.4	0-4		0.6	0-3.5		0.7	0-2.6		0.2	0-0.7		0.1616	0.50096
Fusobacteriaceae		0.4a,b	0.2-21.9		0.5a	0.1-10.5		0.6a,b	0.3-7.3		23.3b	14-59.4		0.0443	0.457767
Alcaligenaceae		0.1	0-1.8		0.5	0.1-2.3		0.1	0-0.7		2.3	0.1-9.7		0.2096	0.541467
Campylobacteraceae		0	0-1.1		0	0-0		0	0-0		0	0-0.1		0.5	0.775
Helicobacteraceae		0	0-0.5		0	0-0.1		0	0-0.5		0.2	0-1.8		0.2031	0.541467
Enterobacteriaceae		0.2	0.1-17.1		0.3	0-3.6		0.2	0-25.8		0.1	0-5.8		0.9438	0.9438
GENUS
Bacterial group		SRE Baseline			SRE 3 Weeks			SRE 8 Weeks			SRE Long Term			SRE Baseline vs SRE 3 Weeks vs SRE 8 Weeks vs SRE Long Term
		Median	Range		Median	Range		Median	Range		Median	Range		P value	Q value
Actinomyces		0	0-0.3		0	0-0.2		0	0-0.1		0	0-0		0.4375	0.80609
Corynebacterium		0a	0-0.1		0a	0-0.5		0a	0-0.3		0a	0-0		0.0299	0.300267
f__Microbacteriaceae;__		0	0-0.1		0	0-0.1		0	0-0.1		0	0-0		0.6875	0.888914
Bifidobacterium		0.1	0-12.8		0.1	0-6.5		0.1	0-14.6		0.1	0-2.5		0.4749	0.80609
Collinsella		0.6a	0-7.3		2.5a	0-12.8		5.6a	0.1-13.4		0.6a	0-3.4		0.0273	0.300267
Slackia		0a	0-0.3		0a	0-0.3		0a	0-0.3		0a	0-0		0.0486	0.300267
Bacteroides		0.2	0.1-14.9		0.8	0.2-11.8		0.5	0.2-15.3		23.3	0.1-31.3		0.1514	0.6056
Parabacteroides		0	0-1.1		0	0-0.3		0	0-0.1		0	0-0.2		0.7431	0.888914
Prevotella		0	0-0.8		0	0-7		0	0-0.1		0	0-4.7		0.8794	0.926817
[Prevotella]		0	0-0.1		0	0-0.8		0	0-0.4		0	0-4		0.25	0.631579
Staphyloccus		0	0-0		0	0-0.1		0	0-0.2		0	0-0		0.25	0.631579
Enterococcus		0.3	0.2-79.6		0.3	0.1-15.4		0.3	0.2-21.7		0.2	0.1-1.3		0.1514	0.6056
f__Lactobacillaceae;__		0	0-0		0	0-0		0	0-0		0	0-0.3		0.25	0.631579
Lactobacillus		0.4	0.1-92.1		0.2	0-42.5		0.1	0-54.5		0.2	0.1-1		0.8566	0.926817
Streptococcus		0.4	0.2-19.8		5	0.2-71.5		0.4	0.2-16.5		4.4	0.2-27.6		0.2982	0.6816
Turicibacter		0.1	0-12.7		0	0-4.4		0	0-1.1		0	0-0		0.3272	0.69287
o__Clostridiales;__;__		0	0-2.6		0	0-0.1		0	0-0.2		0	0-0		0.6667	0.888914
o__Clostridiales;f__;g__		0.1	0-10.2		0.6	0-1.3		0.5	0-0.6		0.4	0-0.6		0.4804	0.80609
f__Clostridiaceae;__		1.8a	0.3-37.3		11.7a	1-26.5		16.1a	9.7-25.1		3.1a	0.6-14.3		0.0313	0.300267
f__Clostridiaceae;g__		0	0-0.4		0	0-1.2		0	0-1		0	0-2		0.2786	0.66864
Clostridium		0.1	0-7.2		0.1	0-9.6		0.1	0-0.9		0.1	0-2.5		0.8882	0.926817
f__Lachnospiraceae;__		4.9	0.2-25		8.7	1-61.2		6	3.1-62.3		3.1	1.6-7.3		0.0755	0.3624
f__Lachnospiraceae;g__		2	0-9.9		2.7	0.5-5.3		3.2	1.3-10.7		1.2	0.3-8		0.709	0.888914
Blautia		2.9	0.2-32.9		10.5	1.8-25.8		11.2	7.5-46.2		1.7	1.1-6.9		0.0548	0.300267
Coprococcus		0.1	0-1.2		0.1	0-0.3		0.2	0-0.6		0	0-0		0.0563	0.300267
Dorea		0	0-0.4		0	0-0.3		0.1	0-0.4		0	0-0		0.2002	0.6288
[Ruminococcus]		3.6	0.1-20.8		2.1	0.3-13.2		3.4	0.5-8.3		1.3	0.6-6.9		0.7709	0.888914
Peptococcus		0	0-0		0	0-0.8		0	0-1.7		0	0-0		0.625	0.888914
f__Peptostreptococcaceae;__		0	0-0.3		0	0-0.6		0	0-0.3		0	0-0		0.5	0.80609
f__Peptostreptococcaceae;g__		0a	0-0.3		0.3a	0-4.5		0a	0-4.3		0a	0-0.1		0.033	0.300267
f__Ruminococcaceae;g__		0	0-2		0.1	0-0.9		0.2	0-0.4		0.2	0-0.8		0.5206	0.80609
Faecalibacterium		0.1	0-2.9		5.2	0-15.2		1.1	0.1-3		3.2	0-8.9		0.5206	0.80609
Oscillospira		0	0-0.1		0	0-0.2		0	0-0.3		0	0-0.1		0.1641	0.605908
Ruminococcus		0	0-4.6		0	0-0.1		0	0-0.1		0	0-0		0.8872	0.926817
Megamonas		0.2	0.1-4.5		1	0.1-11.3		1.8	0.1-23.1		4	0.1-19.9		0.6522	0.888914
Phascolarctobacterium		0	0-0.5		0	0-1.1		0	0-0.5		0	0-1.2		0.9479	0.9479
f__Erysipelotrichaceae;g__		0	0-0.2		0.1	0-0.6		0	0-1.1		0	0-0.3		0.498	0.80609
Allobaculum		0	0-1.1		0	0-1.1		0	0-0.6		0	0-0.2		0.7778	0.888914
Catenibacterium		0a	0-1.9		0a	0-1.3		0a	0-1.8		0a	0-0.3		0.026	0.300267
Coprobacillus		0	0-0.2		0	0-0.1		0	0-0.1		0	0-0		0.6875	0.888914
[Eubacterium]		0	0-0.9		0.1	0-1.3		0.1	0-1.5		0	0-0.3		0.7532	0.888914
f__Fusobacteriaceae;__		0	0-0		0	0-0.1		0	0-0		0	0-0.2		0.625	0.888914
Cetobacterium		0	0-0.1		0	0-0		0	0-0.1		0	0-56		0.332	0.69287
Fusobacterium		0.4a,b	0.1-21.9		0.4a	0.1-10.5		0.6a,b	0.3-7.3		20.3b	3.2-38.1		0.0443	0.300267
Sutterella		0.1	0-1.8		0.5	0.1-2.3		0.1	0-0.7		2.3	0.1-9.7		0.2096	0.6288
Campylobacter		0	0-1.1		0	0-0		0	0-0		0	0-0.1		0.5	0.80609
Helicobacter		0	0-0.5		0	0-0.1		0	0-0.5		0.2	0-1.8		0.2031	0.6288
f__Enterobacteriaceae;g__		0.2	0.1-17		0.3	0-3.6		0.2	0-25.8		0.1	0-5.8		0.9438	0.9479
SPECIES
Bacterial group		SRE Baseline			SRE 3 Weeks			SRE 8 Weeks			SRE Long Term			SRE Baseline vs SRE 3 Weeks vs SRE 8 Weeks vs SRE Long Term
		Median	Range		Median	Range		Median	Range		Median	Range		P value	Q value
g__Actinomyces;s__		0	0-0.3		0	0-0.2		0	0-0.1		0	0-0		0.4375	0.7809
g__Corynebacterium;s__		0a	0-0.1		0a	0-0.5		0a	0-0.3		0a	0-0		0.0299	0.3135
f__Microbacteriaceae;__;__		0	0-0.1		0	0-0.1		0	0-0.1		0	0-0		0.6875	0.833777
g__Bifidobacterium;s__		0.1	0-12.8		0.1	0-6.5		0.1	0-14.6		0.1	0-2.5		0.4749	0.7809
Collinsella stercoris		0.6a	0-7.3		2.4a	0-12.8		4.1a	0.1-13.4		0.6a	0-3.4		0.0273	0.3135
g__Slackia;s__		0a	0-0.3		0a	0-0.3		0a	0-0.3		0a	0-0		0.0486	0.32091
g__Bacteroides;__		0.1	0-3.2		0.1	0-9.9		0.1	0-7.5		6.9	0.1-22.1		0.0933	0.443175
g__Bacteroides;s__		0.1	0-6.7		0.3	0-1.7		0.2	0-11.3		3.5	0-14.4		0.372	0.7809
Bacteroides plebeius		0.1	0-7.6		0.1	0-2.9		0.1	0-1.7		0.7	0-9.6		0.2697	0.690443
Bacteroides uniformis		0	0-0.4		0	0-0.4		0	0-0.3		0	0-0.2		0.875	0.919462
g__Parabacteroides;s__		0	0-0.2		0	0-0.3		0	0-0.1		0	0-0		0.875	0.919462
Prevotella copri		0	0-0.8		0	0-7		0	0-0.1		0	0-4.7		0.8794	0.919462
g__[Prevotella];s__		0	0-0.1		0	0-0.8		0	0-0.4		0	0-4		0.25	0.678571
g__Staphylococcus;s__		0	0-0		0	0-0.1		0	0-0.2		0	0-0		0.25	0.678571
g__Enterococcus;s__		0.3	0.2-79.6		0.3	0.1-15.4		0.3	0.2-21.7		0.2	0.1-1.3		0.1514	0.663831
f__Lactobacillaceae;__;__		0	0-0		0	0-0		0	0-0		0	0-0.3		0.25	0.678571
g__Lactobacillus;__		0	0-0.4		0	0-0.2		0	0-0		0	0-0.1		0.25	0.678571
g__Lactobacillus;s__		0.4	0.1-91.6		0.2	0-42.2		0.1	0-54.5		0.2	0.1-0.9		0.8566	0.919462
g__Streptococcus;s__		0.4	0.2-19.8		5	0.2-71.5		0.4	0.2-16.5		4.4	0.2-27.6		0.2982	0.708225
g__Turicibacter;s__		0.1	0-12.7		0	0-4.4		0	0-1.1		0	0-0		0.3272	0.727846
o__Clostridiales;__;__;__		0	0-2.6		0	0-0.1		0	0-0.2		0	0-0		0.6667	0.833777
o__Clostridiales;f__;g__;s__		0.1	0-10.2		0.6	0-1.3		0.5	0-0.6		0.4	0-0.6		0.4804	0.7809
f__Clostridiaceae;__;__		1.8a	0.3-37.3		11.7a	1-26.5		16.1a	9.7-25.1		3.1a	0.6-14.3		0.0313	0.3135
f__Clostridiaceae;g__;s__		0	0-0.4		0	0-1.2		0	0-1		0	0-2		0.2786	0.690443
g__Clostridium;__		0	0-6.8		0	0-9.2		0	0-0.1		0	0-0.1		0.4479	0.7809
Clostridium perfringens		0	0-6.9		0	0-0.4		0.1	0-0.9		0	0-2.5		0.8568	0.919462
f__Lachnospiraceae;__;__		4.9	0.2-25		8.7	1-61.2		6	3.1-62.3		3.1	1.6-7.3		0.0755	0.391227
f__Lachnospiraceae;g__;s__		2	0-9.9		2.7	0.5-5.3		3.2	1.3-10.7		1.2	0.3-8		0.709	0.841938
g__Blautia;s__		0.9	0.1-17.2		5.6	0.3-20.6		4.3	2.1-35.6		0.6	0.4-3.8		0.4446	0.7809
Blautia producta		2.1	0.1-28.3		5.1	1.2-11		6.5	1.2-10.6		1.1	0.6-6.1		0.0548	0.32091
g__Coprococcus;s__		0.1	0-1.2		0.1	0-0.3		0.2	0-0.6		0	0-0		0.0563	0.32091
g__Dorea;s__		0	0-0.3		0	0-0.3		0.1	0-0.4		0	0-0		0.2002	0.678571
g__[Ruminococcus];__		0	0-0.8		0	0-0.4		0	0-0.4		0	0-0.7		0.3906	0.7809
g__[Ruminococcus];s__		0a	0-1.4		0.3a	0.1-1.1		0.3a	0.1-1.2		0.1a	0-0.2		0.0313	0.3135
[Ruminococcus] gnavus		1.7	0.1-20.8		1.6	0.2-13.2		3	0.4-7.1		1.1	0.3-6.9		0.6522	0.833777
g__Peptococcus;s__		0	0-0		0	0-0.8		0	0-1.7		0	0-0		0.625	0.833777
f__Peptostreptococcaceae;__;__		0	0-0.3		0	0-0.6		0	0-0.3		0	0-0		0.5	0.7809
f__Peptostreptococcaceae;g__;s__		0a	0-0.3		0.3a	0-4.5		0a	0-4.3		0a	0-0.1		0.033	0.3135
f__Ruminococcaceae;g__;s__		0	0-2		0.1	0-0.9		0.2	0-0.4		0.2	0-0.8		0.5206	0.7809
Faecalibacterium prausnitzii		0.1	0-2.9		5.2	0-15.2		1.1	0.1-3		3.2	0-8.9		0.5206	0.7809
g__Oscillospira;s__		0	0-0.1		0	0-0.2		0	0-0.3		0	0-0.1		0.1641	0.668121
g__Ruminococcus;s__		0	0-4.5		0	0-0.1		0	0-0.1		0	0-0		0.8872	0.919462
g__Megamonas;s__		0.2	0.1-4.5		1	0.1-11.3		1.8	0.1-23.1		4	0.1-19.9		0.6522	0.833777
g__Phascolarctobacterium;s__		0	0-0.5		0	0-1.1		0	0-0.5		0	0-1.2		0.9479	0.9479
f__Erysipelotrichaceae;g__;s__		0	0-0.2		0.1	0-0.6		0	0-1.1		0	0-0.3		0.498	0.7809
g__Allobaculum;s__		0	0-1.1		0	0-1.1		0	0-0.6		0	0-0.2		0.7778	0.904788
g__Catenibacterium;s__		0a	0-1.9		0a	0-1.3		0a	0-1.8		0a	0-0.3		0.026	0.3135
g__Coprobacillus;s__		0	0-0.2		0	0-0.1		0	0-0.1		0	0-0		0.6875	0.833777
[Eubacterium] biforme		0	0-0.9		0	0-1.1		0.1	0-1.5		0	0-0		0.6719	0.833777
[Eubacterium] dolichum		0	0-0.3		0	0-1.3		0	0-0.1		0	0-0.3		0.2443	0.678571
f__Fusobacteriaceae;__;__		0	0-0		0	0-0.1		0	0-0		0	0-0.2		0.625	0.833777
Cetobacterium somerae		0	0-0.1		0	0-0		0	0-0.1		0	0-56		0.332	0.727846
g__Fusobacterium;s__		0.4a,b	0.1-21.9		0.4a	0.1-10.5		0.6a,b	0.3-7.3		20.3b	3.2-38.1		0.0443	0.32091
g__Sutterella;s__		0.1	0-1.8		0.5	0.1-2.3		0.1	0-0.7		2.3	0.1-9.7		0.2096	0.678571
g__Campylobacter;s__		0	0-1.1		0	0-0		0	0-0		0	0-0.1		0.5	0.7809
g__Helicobacter;s__		0	0-0		0	0-0.1		0	0-0		0	0-0		0.625	0.833777
f__Enterobacteriaceae;g__;s__		0.2	0.1-17		0.3	0-3.6		0.2	0-25.8		0.1	0-5.8		0.9438	0.9479
